# Supplementary material for: NIV Is not Adequate for High Intensity Endurance Exercise in COPD
Source: MDPI journal article supplement (doi:10.3390/jcm9041054), 2020-04-08
Supplement: s1 [file s1]

# Supplementary Materials: NIV Is not Adequate for High Intensity Endurance Exercise in COPD

Tristan Bonnevie \*, Francis-Edouard Gravier, Emeline Fresnel, Adrien Kerfourn, Clément Medrinal, Guillaume Prieur, Yann Combret, Jean-François Muir, Antoine Cuvelier, David Debeaumont, Gregory Reyhler, Maxime Patout and Catherine Viacroze

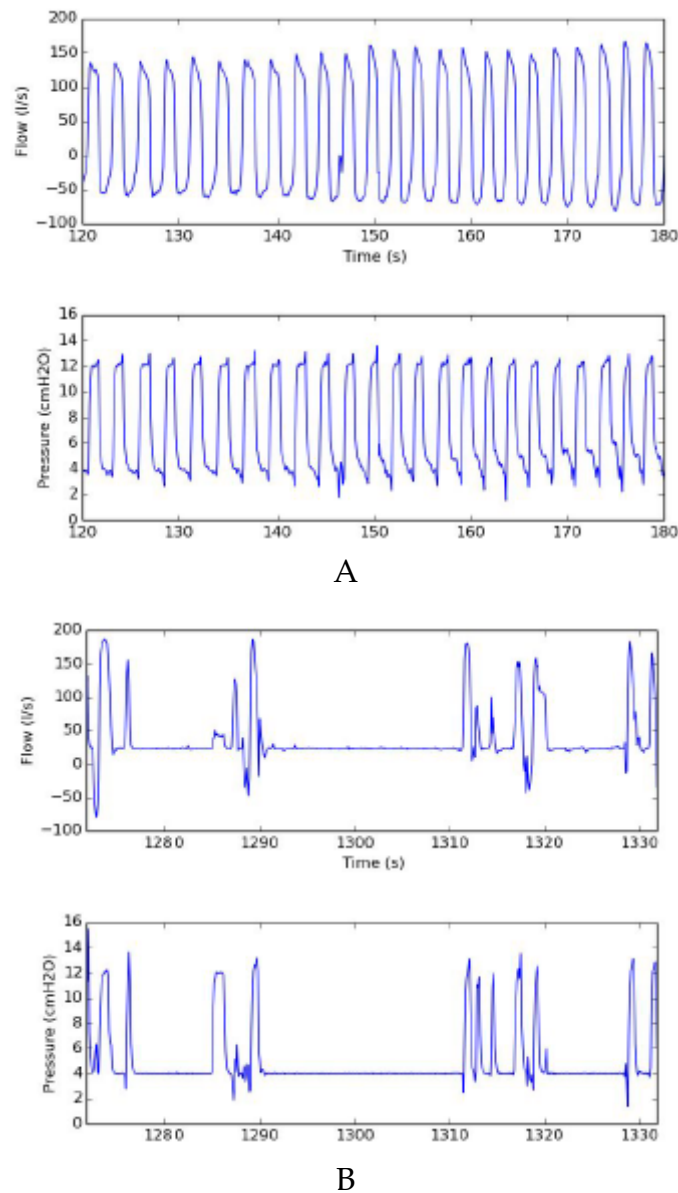

**Figure S1.** Comparison in ventilatory dynamic between the beginning (A) and the end (B) of exercise in a representative subject with nasal mask. The occurrence of ineffective effort at the end of exercise is in coherence with mouth leaks.

**Table S1.** Noninvasive ventilation settings.

| Variables (Units)                                        | Interface                         |                                | Between-Group Comparison |
|----------------------------------------------------------|-----------------------------------|--------------------------------|--------------------------|
|                                                          | Oronasal Mask<br>( <i>n</i> = 21) | Nasal Mask<br>( <i>n</i> = 21) | <i>p</i>                 |
| Inspiratory support (cmH <sub>2</sub> O)                 | 8 (8–10)                          | 10 (8–10)                      | NS                       |
| Expiratory positive airway pressure (cmH <sub>2</sub> O) | 4 (4–5)                           | 4 (4–5)                        | NS                       |
| Slope                                                    | 1 (1–3)                           | 1 (1–2)                        | NS                       |

Values expressed as medians (25th–75th percentile). NS, not significant.

**Table S2.** Comparison in flow and pressure between the beginning and the end of exercise.

| Variable, (Units)                  | Moment During Exercise           |                                  | Intra-Group Comparison |
|------------------------------------|----------------------------------|----------------------------------|------------------------|
|                                    | First Minute                     | Last Minute                      | <i>p</i>               |
| <b>Fini (L/min)</b>                |                                  |                                  |                        |
| Oronasal interface, <i>n</i> = 17  | 33.2 (26.2–39.4) <sup>b</sup>    | 75.9 (44.6–109.2) <sup>b</sup>   | <i>p</i> < 0.01        |
| Nasal interface, <i>n</i> = 15     | 41.5 (22.2–49.0) <sup>b</sup>    | 38.0 (30.8–58.7) <sup>b</sup>    | NS                     |
| Between-group comparison, <i>p</i> | NS                               | <i>p</i> < 0.05                  |                        |
| <b>Fmax (L/min)</b>                |                                  |                                  |                        |
| Oronasal interface, <i>n</i> = 17  | 149.2 (124.7–174.7) <sup>b</sup> | 214.0 (200.2–230.2) <sup>b</sup> | <i>p</i> < 0.01        |
| Nasal interface, <i>n</i> = 15     | 128.1 (99.9–148.6) <sup>b</sup>  | 132.1 (110.5–179.0) <sup>b</sup> | <i>p</i> < 0.01        |
| Between-group comparison, <i>p</i> | <i>p</i> < 0.05                  | <i>p</i> < 0.01                  |                        |
| <b>Pinspi (cmH<sub>2</sub>O)</b>   |                                  |                                  |                        |
| Oronasal interface, <i>n</i> = 17  | 10.0 (9.3–11.8) <sup>b</sup>     | 8.7 (8.5–10.5) <sup>b</sup>      | <i>p</i> < 0.01        |
| Nasal interface, <i>n</i> = 15     | 10.3 (2.8) <sup>a</sup>          | 10.3 (2.4) <sup>a</sup>          | NS                     |
| Between-group comparison, <i>p</i> | NS                               | NS                               |                        |
| <b>Pmax (cmH<sub>2</sub>O)</b>     |                                  |                                  |                        |
| Oronasal interface, <i>n</i> = 17  | 13.9 (2.0) <sup>a</sup>          | 14.7 (2.1) <sup>a</sup>          | <i>p</i> < 0.01        |
| Nasal interface, <i>n</i> = 15     | 13.7 (3.1) <sup>a</sup>          | 14.3 (3.2) <sup>a</sup>          | <i>p</i> < 0.05        |
| Between-group comparison, <i>p</i> | NS                               | NS                               |                        |
| <b>Pmin (cmH<sub>2</sub>O)</b>     |                                  |                                  |                        |
| Oronasal interface, <i>n</i> = 17  | 4.3 (0.6) <sup>a</sup>           | 3.3 (0.7) <sup>a</sup>           | <i>p</i> < 0.01        |
| Nasal interface, <i>n</i> = 15     | 4.1 (0.6) <sup>a</sup>           | 3.8 (0.5) <sup>a</sup>           | <i>p</i> < 0.05        |
| Between-group comparison, <i>p</i> | NS                               | <i>p</i> < 0.05                  |                        |
| <b>Pdiff (cmH<sub>2</sub>O)</b>    |                                  |                                  |                        |

|                               |                        |                         |            |
|-------------------------------|------------------------|-------------------------|------------|
| Oronasal interface, n = 17    | 9.6 (2.1) <sup>a</sup> | 11.4 (2.2) <sup>a</sup> | $p < 0.01$ |
| Nasal interface, n = 15       | 9.6 (2.8) <sup>a</sup> | 10.5 (2.9) <sup>a</sup> | $p < 0.01$ |
| Between-group comparison, $p$ | NS                     | NS                      |            |

<sup>a</sup>Values expressed as means (SD). <sup>b</sup>Values expressed as medians (25th–75th percentile). Fini: flow at the beginning of the cycle; Fmax: maximal flow; Pinspi: mean inspiratory pressure; Pmax: maximal pressure; Pmin: minimal pressure; Pdiff: differential pressure. NS, not significant.

**Table S3.** Comparison of flow and pressure between subjects with IE AI  $\leq 10\%$  or  $> 10\%$  for nasal interface.

| Variables<br>(Units)                           | Proportion of Ineffective Effort<br>Asynchrony Index (%) |                      | Between-<br>Group<br>Comparison |
|------------------------------------------------|----------------------------------------------------------|----------------------|---------------------------------|
|                                                | $\leq 10\%$<br>(n = 8)                                   | $> 10\%$<br>(n = 7)  | $p$                             |
| P <sub>inspi,beg</sub><br>(cmH <sub>2</sub> O) | 11.3 (9.7–14.4)                                          | 8.6 (8.2–9.2)        | $p < 0.05$                      |
| P <sub>inspi,end</sub><br>(cmH <sub>2</sub> O) | 10.3 (8.0–13.3)                                          | 9.1 (8.9–10.0)       | NS                              |
| P <sub>min,var</sub><br>(cmH <sub>2</sub> O)   | −0.47 (−0.6–−0.28)                                       | 0.00 (−0.12–0.01)    | $p < 0.05$                      |
| IRR <sub>var</sub>                             | 7.4 (5.5–13.0)                                           | 3.4 (−1.8–5.3)       | NS                              |
| Leaks (L/min)                                  | 8.2 (4.5–14.4)                                           | 25.6 (10.8–32.1)     | $p < 0.05$                      |
| F <sub>ini,beg</sub> (L/min)                   | 22.2 (19.3–23.2)                                         | 48.9 (46.2–51.8)     | $p < 0.01$                      |
| F <sub>ini,var</sub> (L/min)                   | 15.0 (9.3–43.3)                                          | −10.5 (−12.9–2.6)    | $p < 0.01$                      |
| F <sub>ini,end</sub> (L/min)                   | 39.5 (29.3–58.1)                                         | 37.7 (32.9–48.9)     | NS                              |
| F <sub>max,beg</sub> (L/min)                   | 142.7 (132.2–148.9)                                      | 102.8 (91.4–118.5)   | NS                              |
| F <sub>max,end</sub> (L/min)                   | 179.0 (171.4–181.2)                                      | 110.5 (101.4–126.0)  | $p < 0.01$                      |
| F <sub>max,var</sub> (L/min)                   | 36.3 (31.5–45.2)                                         | 1.9 (−3.6–12.5)      | $p < 0.05$                      |
| F <sub>diff,beg</sub> (L/min)                  | 112.8 (106.5–126.3)                                      | 50.1 (42.9–78.0)     | $p < 0.01$                      |
| F <sub>diff,end</sub> (L/min)                  | 122.3 (104.8–143.2)                                      | 72.8 (61.8–74.8)     | $p < 0.01$                      |
| $\tau_{beg}$ (ms)                              | 447.4.8 (438.1–488.8)                                    | 425.0 (376.2–461.8)  | NS                              |
| $\tau_{end}$ (ms)                              | 448.2 (403.0–496.3)                                      | 432.7 (356.9–513.66) | NS                              |

Values expressed as medians (25th–75th percentile). Pinspi: mean inspiratory pressure; beg: outcome assessed at the beginning of exercise; Pmin: minimal pressure; var: difference between the end minus the beginning of exercise; IRR: instantaneous respiratory rate; Fini: flow at the beginning of the cycle; end: outcome assessed at the end of exercise; Fmax: maximal flow; Fdiff: differential flow;  $\tau$ : pressure rise time. NS, not significant.

**Table S4.** Comparison of cycle time, instantaneous respiratory rate and Ti/Ttot between interfaces.

| Variables (Units)           | Interface                         |                                  | Between-Group Comparison<br><i>p</i> |
|-----------------------------|-----------------------------------|----------------------------------|--------------------------------------|
|                             | Oronasal Mask<br>( <i>n</i> = 21) | Nasal Mask<br>( <i>n</i> = 21)   |                                      |
| IRR <sub>mean</sub>         | 25.5 (4.9) <sup>a</sup>           | 23.7 (4.6) <sup>a</sup>          | <i>p</i> < 0.05                      |
| IRR <sub>var</sub>          | 7.1 (5.2) <sup>a</sup>            | 4.3 (5.9) <sup>a</sup>           | NS                                   |
| CT <sub>mean</sub>          | 2.2 (2.2–2.8) <sup>b</sup>        | 2.6 (2.3–2.9) <sup>b</sup>       | <i>p</i> < 0.05                      |
| Ti/Ttot <sub>mean</sub> (%) | 29.2 (0.1) <sup>a</sup>           | 29.3 (0.1) <sup>a</sup>          | NS                                   |
| τ <sub>mean</sub> (ms)      | 458.8 (419.5–530.1) <sup>b</sup>  | 477.1 (448.7–497.7) <sup>b</sup> | NS                                   |

<sup>a</sup>Values expressed as mean (SD). <sup>b</sup>Values expressed as medians (25th–75th percentile). IRR: instantaneous respiratory rate; CT: cycle time; Ti/Ttot: ratio between inspiratory time and total time; τ: pressure rise time. NS, not significant.
